# Supplementary material
Source: publisher site journal article supplement (https://www.dovepress.com/get_supplementary_file.php?f=321631.docx)
Supplement: Supplementary file 1 [file get_supplementary_file.php]

Supporting Information

**Levofloxacin-loaded Nanosonosensitizer as a Highly Efficient Therapy for Bacillus Calmette-Guérin Infections Based on Bacteria-specific Labeling and Sonotheranostic Strategy**

Gangjing Li a,b , Jianhu Li a,b, Yuru Hou a,b, Shuang Xie a,b, Jieru Xu c, Min Yang a,b, Dairong Li c and Yonghong Du a,b

aState Key Laboratory of Ultrasound in Medicine and Engineering, College of Biomedical Engineering, Chongqing Medical University,Chongqing, 400016, China.

bChongqing Key Laboratory of Biomedical Engineering, Chongqing Medical University, Chongqing, 400016, China.

c**Department of Respiratory and Critical Care Medicine, the First Affiliated Hospital of Chongqing Medical University, Chongqing 400016, China.**

**METHODS**

**Determination of LVFX minimum inhibitory concentration (MIC)**

The minimum inhibitory concentration (MIC) assay was performed on *BCG* using the trace broth dilution method. In short, the *BCG* suspensions (OD600=1.0) were transferred to 96-well microtiter plates in the presence of multiple concentrations of LVFX (0~1280 μg/mL) which were prepared by serial 2-fold dilution and incubated at 37 °C for 7 days. Then the absorbance of the bacteria in the 96-well plate was detected via a microplate reader. The MIC is defined as the lowest drug concentration corresponding to the lowest absorbance value.

**Selection of ultrasound radiation parameters**

The Low-frequency and low-intensity ultrasound system device used in this experiment was developed by the Biomedical Engineering of Chongqing Medical University. A total of 1 mL of *BCG* suspension was transferred into each well of a 35-mm plastic petri dish which was directly placed above the transducer with a gentle squeeze to expel air. Then each group was irradiated at different ultrasonic intensities (0.15, 0.34, 0.67 and 1.0 W/cm2) for different times (5, 10 and 15 min).

**The establishment of the *BCG*-infected SD rat model**

After 14-day treatment, the abscesses were dissected from the rats for hematoxylin and eosin(H&E) staining and acid-fast staining. Histopathological changes were observed under a light microscope. The acid-fast staining result of *BCG* shows red rod-shaped bacteria.

**The safety of ultrasound on exposed skin**

The *BCG* suspension was exposed to ultrasound at an intensity of 0.67 W/cm2 for 5 min *in vitro*. The safety of this ultrasound (0.67 W/cm2, 5 min) on skin was verified using a rat skin model. Briefly, the hair from the lower part of the back of the SD rats was clipped, then applied medical ultrasonic coupling agent evenly and irradiated by ultrasound (0.67 W/cm2, 5 min) or not. After 24 h, the irradiated part was taken for histopathological observation.

**The effect of BM2 aptamer on the morphology of *BCG***

The effect of BM2 aptameron the morphology of *BCG* wasinvestigated. BM2 aptamer (5 μM) was added to the *BCG* suspension, and co-incubated at 37 ℃ for 5 h. Then the mixture was centrifuged at 5000 rpm for 5 minutes to remove excess BM2 aptamer, and bacteria were observed via a scanning electron microscopy (SEM, Hitachi High-Technologies, Tokyo, Japan).

**Serum biochemical analysis**

Blood samples were collected from the intraocular canthus of rats after 14-day treatment and centrifuged to obtain serum. The biochemical analysis was performed for the heart, liver, and kidney functional markers, including alanine aminotransferase (ALT), aspartate transaminase (AST), total bilirubin (TBIL), creatinine (CREA), blood urea nitrogen (BUN) through a biochemical auto analyzer (Catalyst Dx, IDEXX, USA). Meanwhile, the cytokines IFN-γ in rats were measured by the enzyme-linked immunosorbent assay (ELISA) following protocols recommended by the manufacturer.

**Figures**


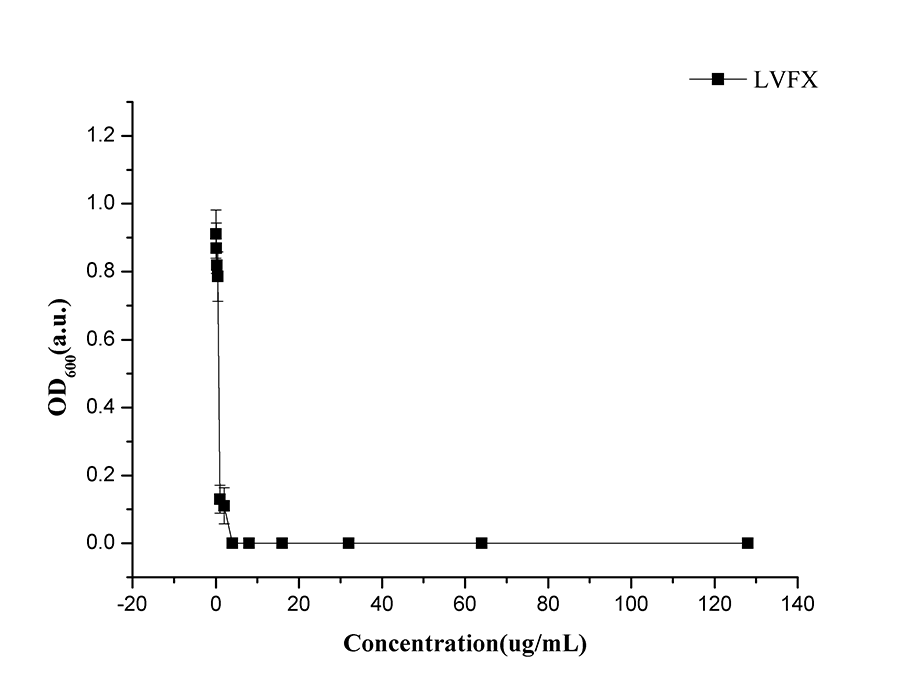


**Figure S1.** The minimum inhibitory concentration (MIC) results of LVFX in *BCG* using the trace broth dilution method.


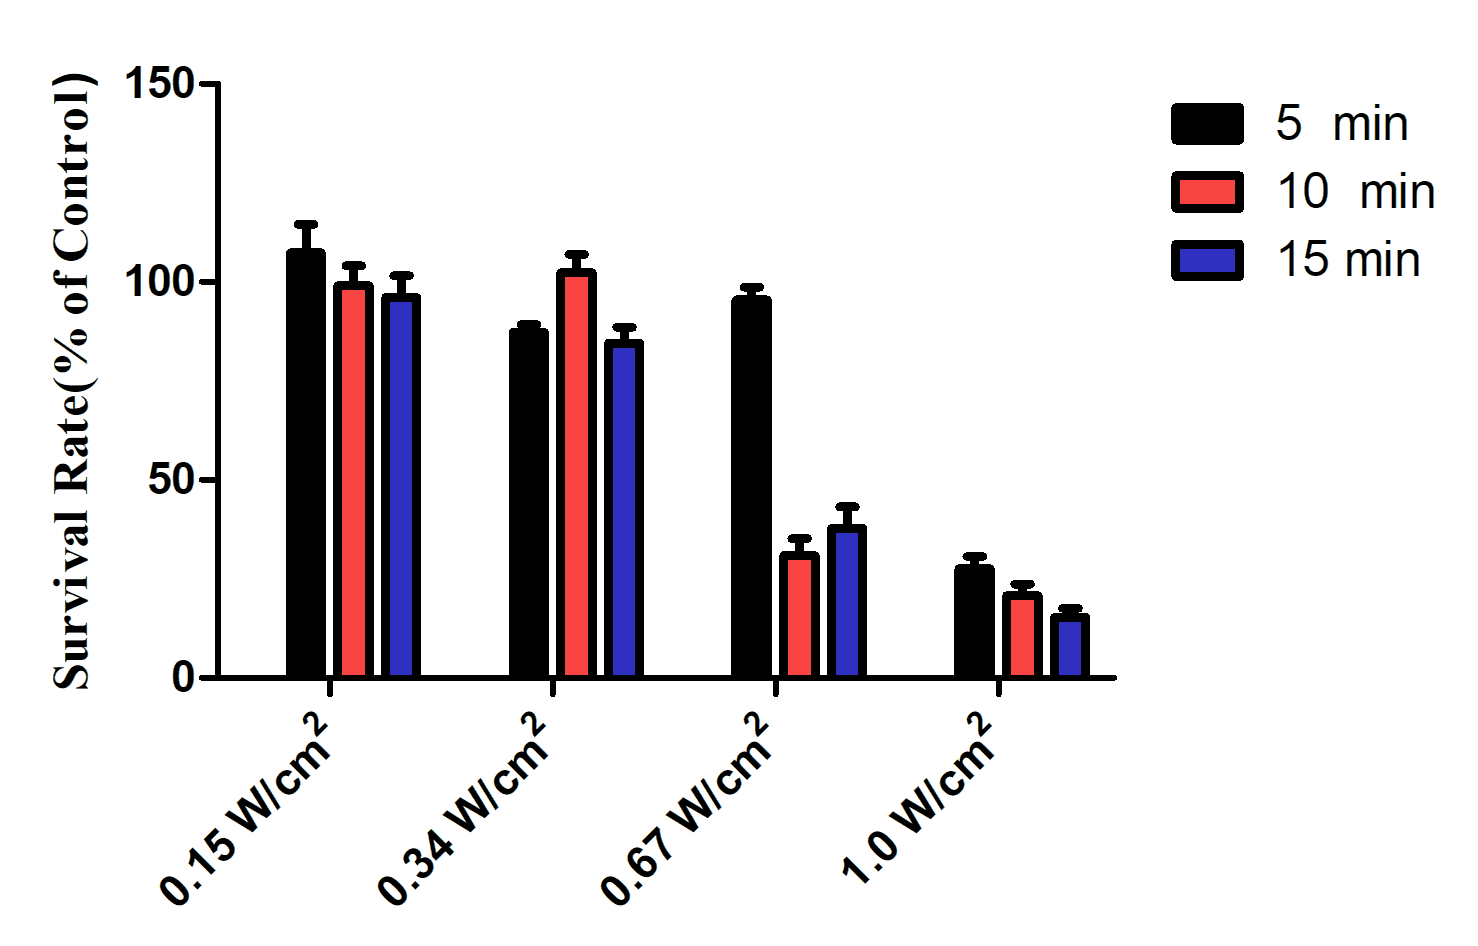


**Figure S2.** The survival rate of *BCG* after ultrasonic irradiation at different intensities (0.15, 0.34, 0.67 and 1.0 W/cm2) and time (5, 10 and 15 min) was measured by standard plate count method.


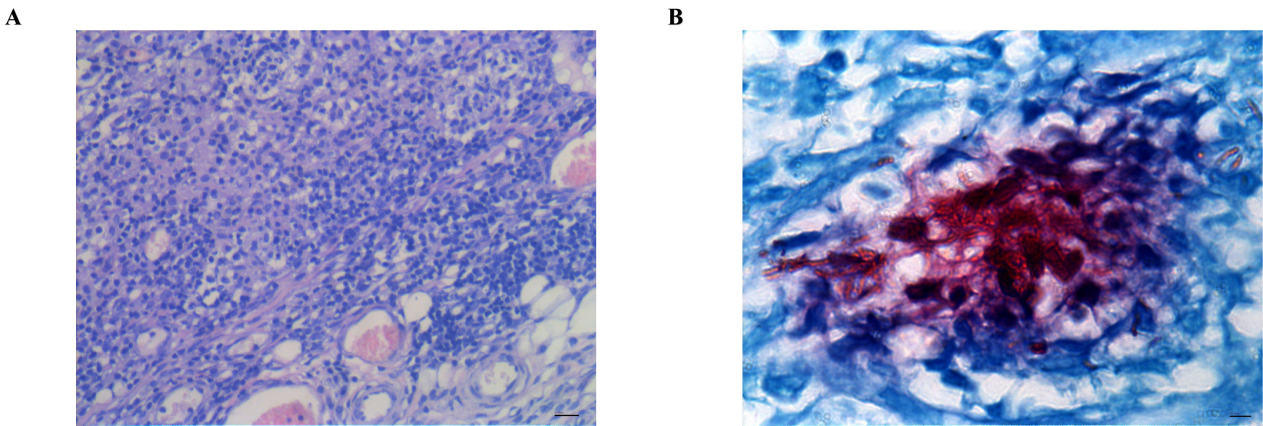


**Figure S3.** *BCG* bacteria fluids were subcutaneously injected into the right buttock tissue of SD rats to establish the model of *BCG* subcutaneous infections. (A) H&E and (B) acid-fast staining results were performed. H&E-stained image was taken at ×200 magnification and the acid-fast staining image was taken at ×1000 magnification.


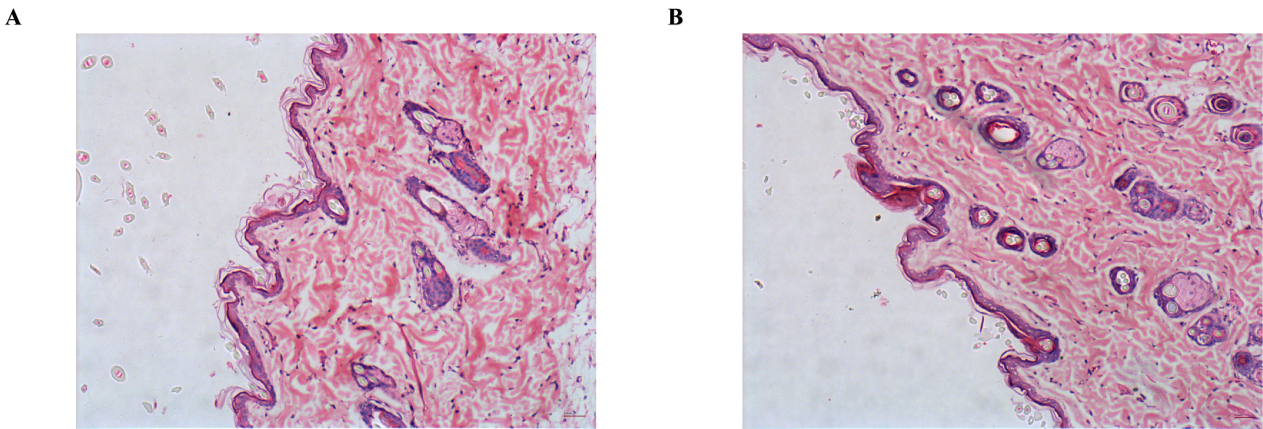


**Figure S4.** The histopathological changes of rat skin tissue 24 h after ultrasound irradiation at an intensity of 0.67 W/cm2 for 5 min showed no obvious changes of the skin surface(A). The rat skin with mock ultrasound exposures displays a normal structure (B). H&E-stained images were taken at ×100 magnification.


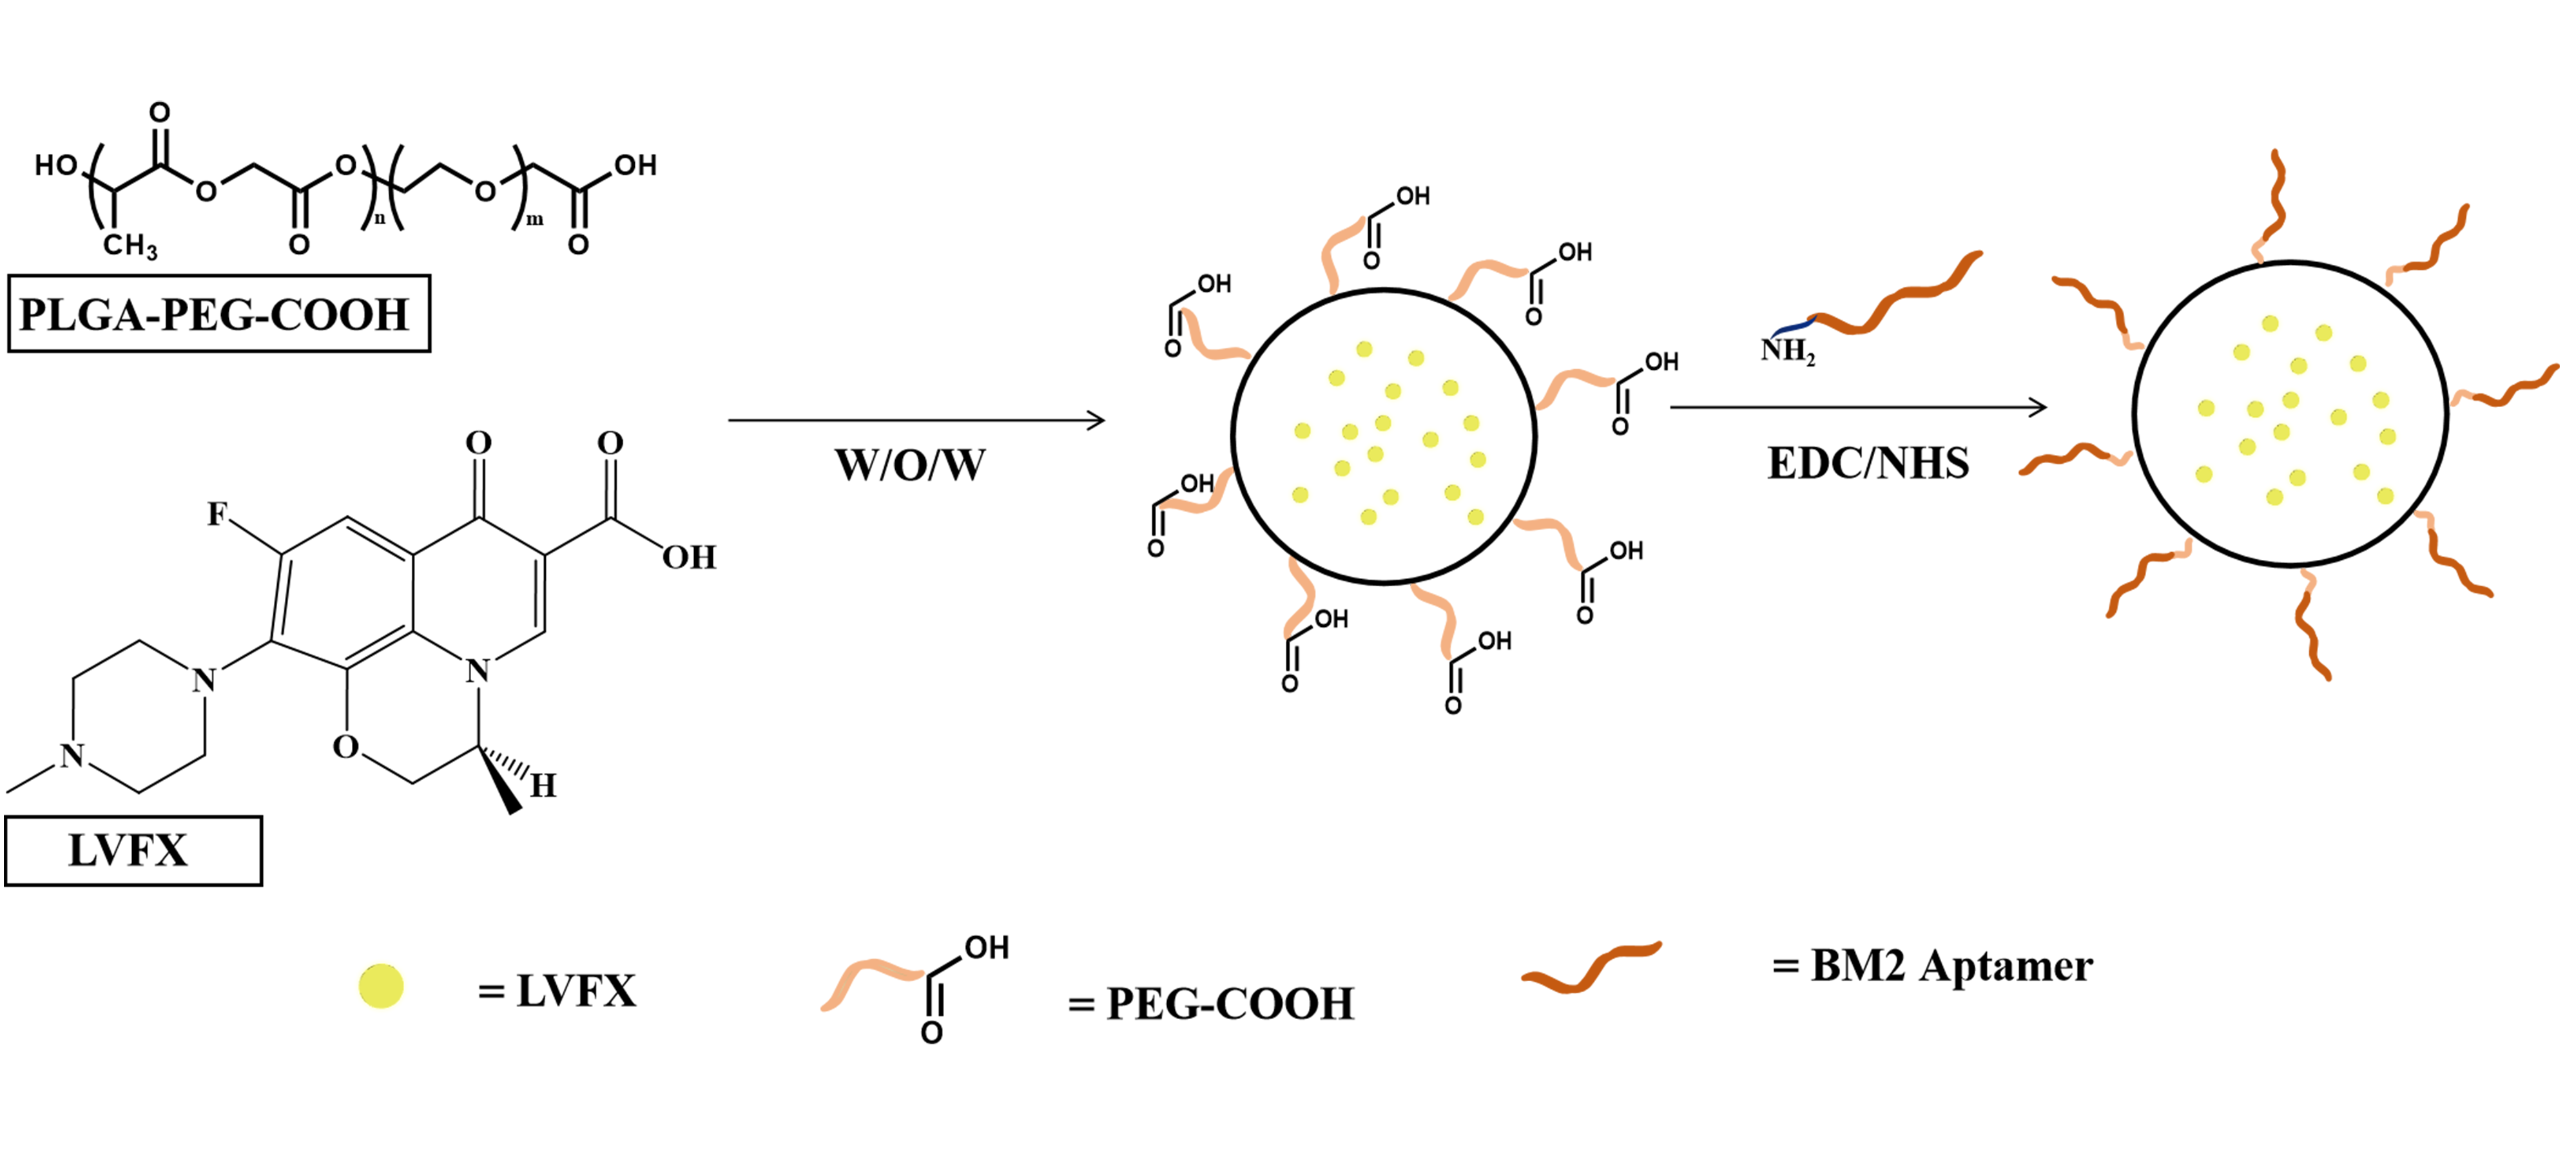
**Figure S5.** Schematic diagram for the construction of BM2-LVFX-NPs.


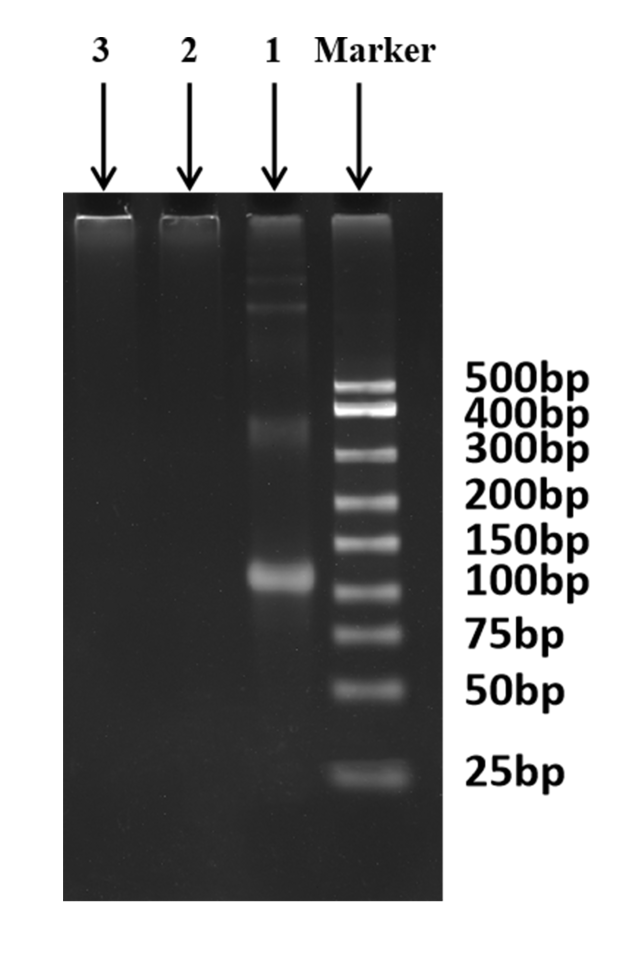


**Figure S6** Confirmation of BM2-NPs conjugation by gel electrophoresis. DNA molecular weight marker (Mw) is shown on the right.


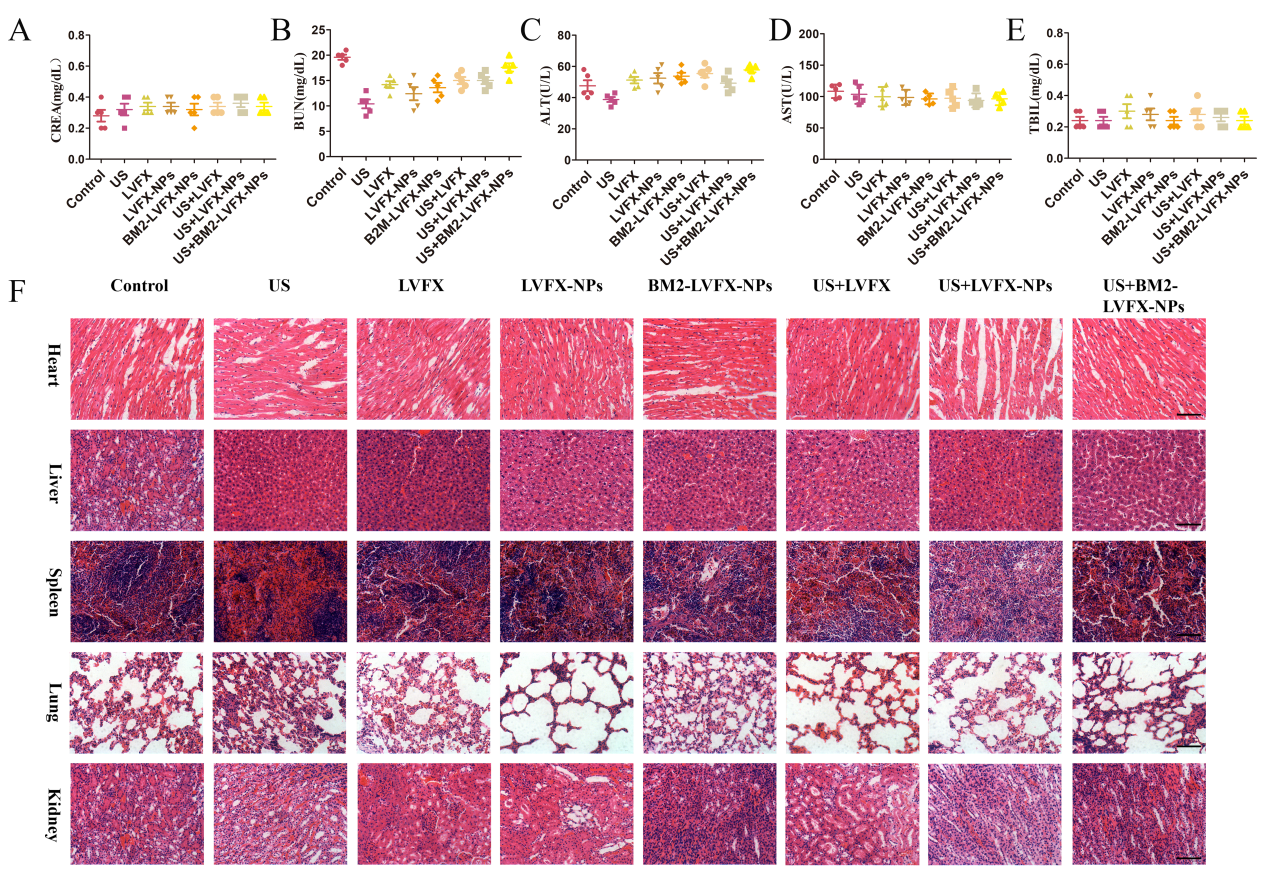


**Figure S7.** Biosafety assay. (A) Serum CREA, (B) BUN, (C) ALT, (D) AST and (E) TBIL indexes of rat in each group after14-day treatment. (F) Histopathologic observation of the major organs including heart, liver, spleen, lung, kidney of every group after being treated in various ways. The scale bar is 100 μm.

Abbreviations: CREA, creatinine; BUN, blood urea nitrogen; ALT, alanine aminotransferase; AST, aspartate transaminase; TBIL, total bilirubin.


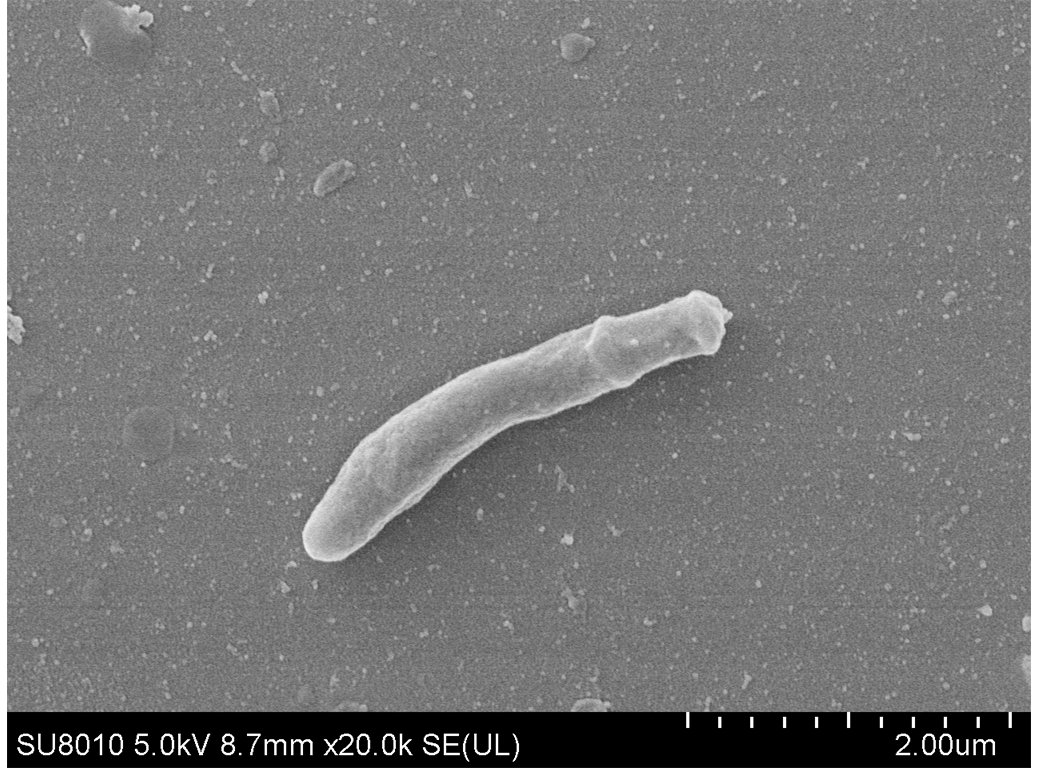


**Figure S8.** The SEM image of BM2(5 μM) aptamer co-cultured with *BCG* for 5 h at 37 ℃.


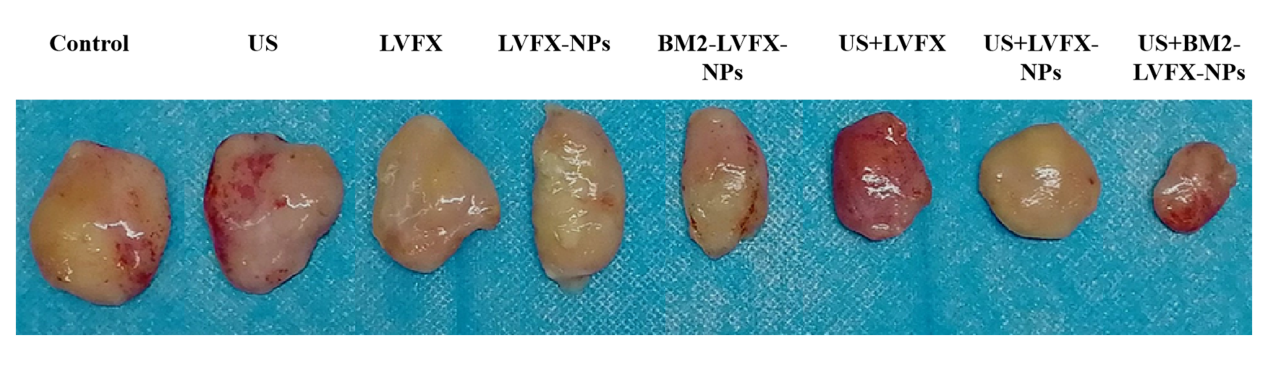


**Figure S9.** Pictures of abscess volume in different groups after a 14-day treatment.
